# Supplementary material for: Synthesis of Cu3P nanocubes and their excellent electrocatalytic efficiency for the hydrogen evolution reaction in acidic solution
Source: Royal Society of Chemistry journal article supplement (doi:10.1039/c5ra24427g), 2016-01-01
Supplement: c5ra24427g1.pdf [file c5ra24427g1.pdf]

## Supporting Information

### **Synthesis of Cu<sub>3</sub>P nanocubes and their excellent electrocatalytic efficiency for hydrogen evolution reaction in acidic solution**

Lianbo Ma <sup>a</sup>, Xiaoping Shen <sup>a\*</sup>, Hu Zhou <sup>b</sup>, Jun Zhu <sup>a</sup>, Chunyan Xi <sup>a</sup>, Zhenyuan Ji <sup>a</sup>,

Lirong Kong<sup>a</sup>

*<sup>a</sup> School of Chemistry and Chemical Engineering, Jiangsu University, Zhenjiang 212013, P. R. China,*

*<sup>b</sup> School of Material Science and Engineering, Jiangsu University, Zhenjiang 212003, P. R. China*

---

*\* Corresponding author. Tel/Fax: +86-511-88791800.*

*E-mail address: [xiaopingshen@163.com](mailto:xiaopingshen@163.com) (Xiaoping Shen).*

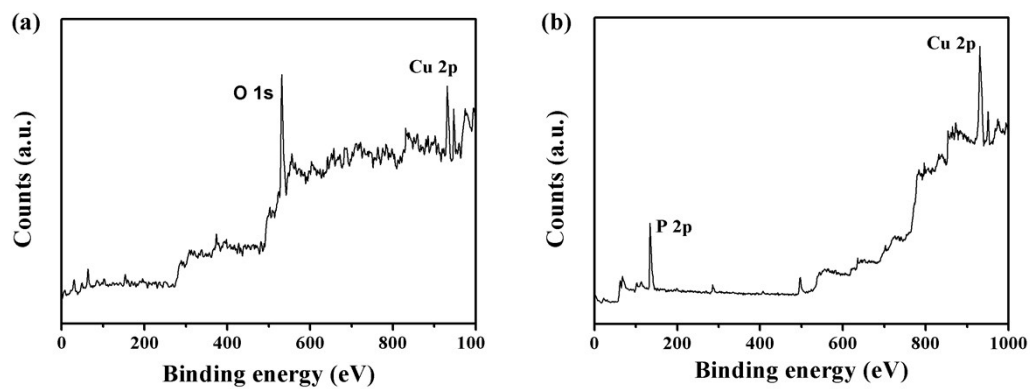

**Fig. S1**, Survey spectra of X-ray photoelectron spectroscopy (XPS) for both (a)  $\text{Cu}_2\text{O}$  and (b)  $\text{Cu}_3\text{P}$  nanocubes.

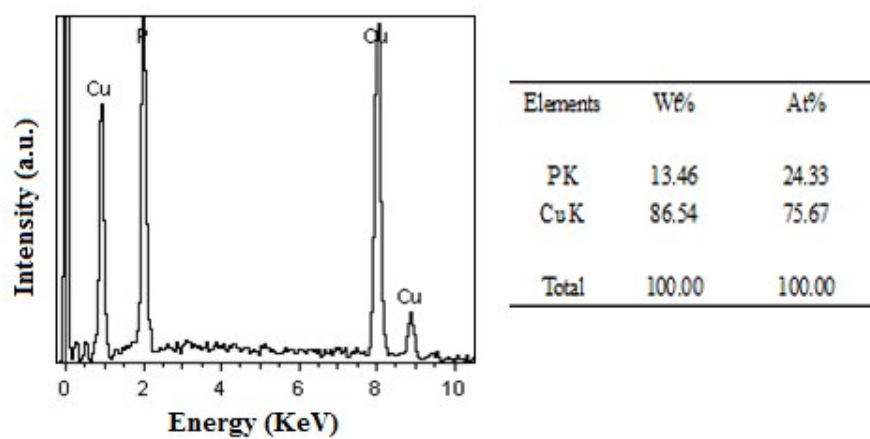

**Fig. S2.** The EDS spectrum of  $\text{Cu}_3\text{P}$  product.

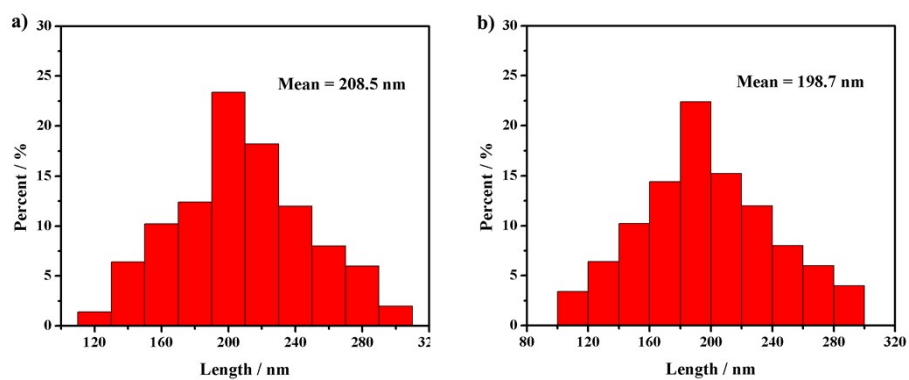

**Fig. S3.** The length distribution diagrams of (a)  $\text{Cu}_2\text{O}$  and (b)  $\text{Cu}_3\text{P}$  nanocubes.

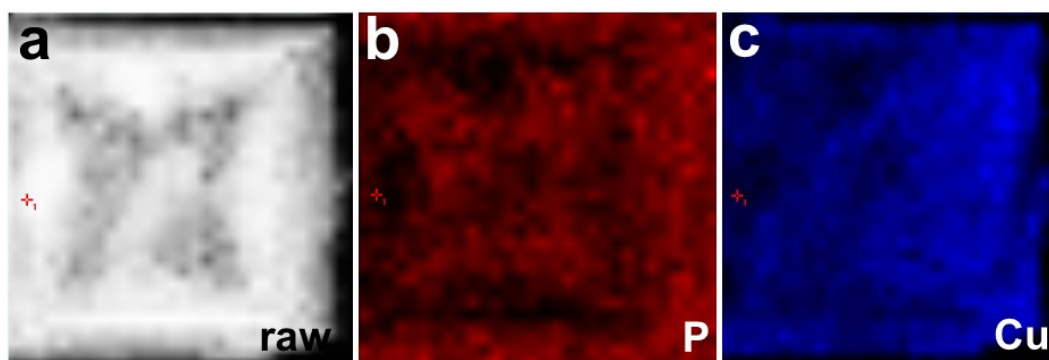

**Fig. S4.** EDX elemental mapping of  $\text{Cu}_3\text{P}$  nanotube: (a) raw, (b) P, and (c) Cu element.

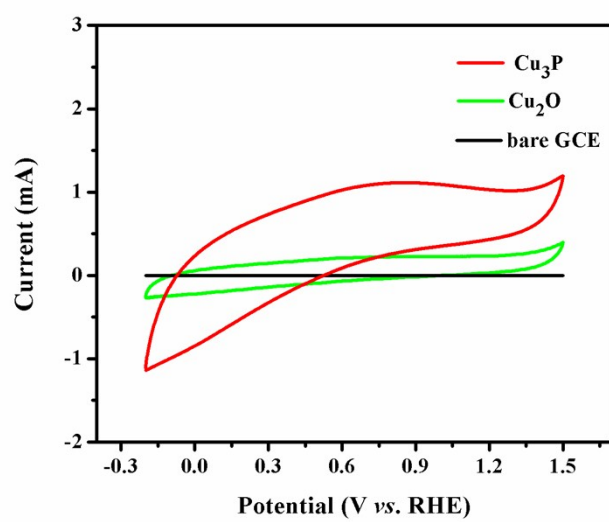

**Fig. S5.** CV curves of the Cu<sub>3</sub>P, Cu<sub>2</sub>O and bare GCE.

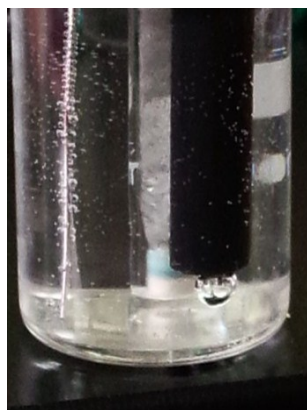

**Fig. S6.** Optical photograph showing the generation of hydrogen bubbles on  $\text{Cu}_3\text{P}$  composite modified GCE.

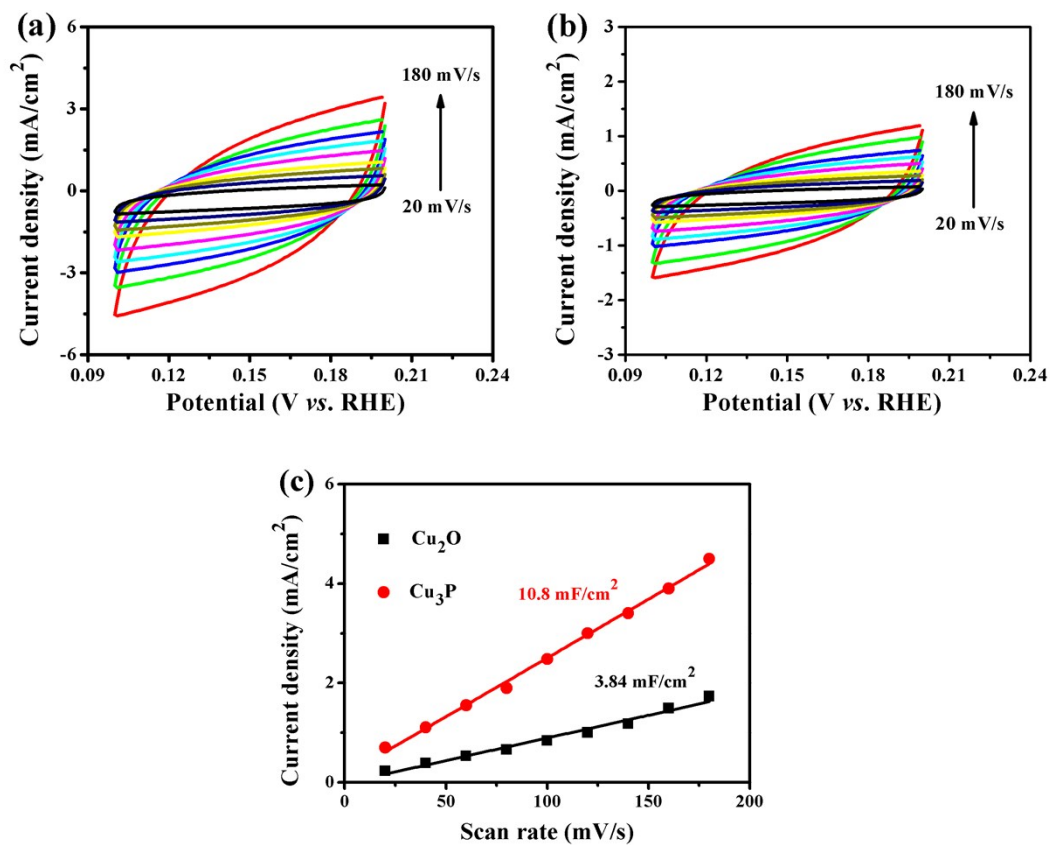

**Fig. S7.** CV curves of (a)  $\text{Cu}_3\text{P}$  and (b)  $\text{Cu}_2\text{O}$  nanocubes at various sweep rates (20-180  $\text{mV}/\text{s}$ ). (c) The capacitive currents at 0.15 V as a function of scan rate for both  $\text{Cu}_2\text{O}$  and  $\text{Cu}_3\text{P}$  nanocubes.

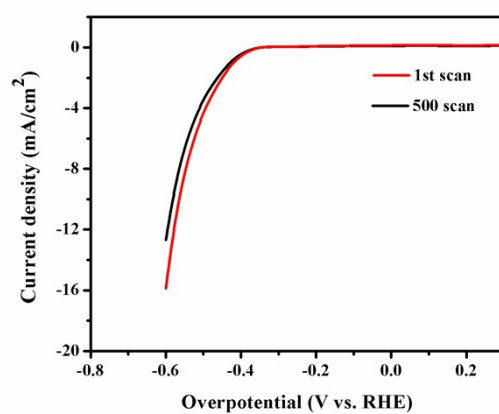

**Fig. S8.** The LSV polarization curves of the  $\text{Cu}_2\text{O}$  electrode at the 1st and the 500th cycle number.
